# Supplementary material for: Comparative Analysis of Soil‐Water Characteristic Curve in Fractal and Empirical Models
Source: Hindawi journal article supplement (doi:10.1155/2020/1970314), 2020-01-01
Supplement: f1 [file 1970314.f1.xlsx]

## Sheet: Sheet1
	S1: This table is corresponding to Figure 2 (Measured values of SWCCs of Hunan clay with different initial dry densities)
	Initial dry density (g/cm3)	Matrix suction (kPa)	Volumetric water content	Initial dry density (g/cm3)	Matrix suction (kPa)	Volumetric water content	Initial dry density (g/cm3)	Matrix suction (kPa)	Volumetric water content
	1.3	0.1	0.53651	1.35	0.1	0.521505	1.4	0.1	0.51464
		5	0.49413		5	0.497205		5	0.5054
		10	0.44616		10	0.46818		10	0.4802
		30	0.36595		30	0.382995		30	0.38752
		80	0.33761		80	0.3537		80	0.35784
		160	0.31928		160	0.3348		160	0.34006
		280	0.30407		280	0.319005		280	0.32466
		450	0.29276		450	0.30672		450	0.3129
		700	0.28132		700	0.29484		700	0.30086
		1250	0.2678		1250	0.279585		1250	0.28602
	Initial dry density (g/cm3)	Matrix suction (kPa)	Volumetric water content	Initial dry density (g/cm3)	Matrix suction (kPa)	Volumetric water content	Initial dry density (g/cm3)	Matrix suction (kPa)	Volumetric water content
	1.45	0.1	0.503295	1.5	0.1	0.50625	1.6	0.1	0.49216
		5	0.49155		5	0.50085		5	0.49216
		10	0.48952		10	0.4983		10	0.48992
		30	0.396865		30	0.41685		30	0.45552
		80	0.366995		80	0.38475		80	0.408
		160	0.34974		160	0.3666		160	0.38864
		280	0.334515		280	0.34995		280	0.37152
		450	0.322045		450	0.33735		450	0.35776
		700	0.309865		700	0.32505		700	0.34528
		1250	0.293625		1250	0.3087		1250	0.32688
	S2: This table is corresponding to Figure 3 (Variation curve of mass water content of Hunan clay with time)
	Initial dry density (g/cm3)	Time ( h )	Mass water content	Initial dry density (g/cm3)	Time ( h )	Mass water content	Initial dry density (g/cm3)	Time ( h )	Mass water content
	1.3	0	0.4127	1.35	0	0.39901	1.4	0	0.3794
		8	0.3771		8	0.34568		8	0.35095
		14	0.3129		14	0.29827		14	0.29143
		20	0.2519		20	0.22074		20	0.21929
		26	0.2185		26	0.19605		26	0.18893
		32	0.1937		32	0.17333		32	0.16929
		44	0.1241		44	0.11832		44	0.11079
		50	0.1113		50	0.10754		50	0.10271
		56	0.08712		56	0.07498		56	0.07095
		68	0.0517		68	0.04827		68	0.04881
		74	0.0437		74	0.04012		74	0.0431
		92	0.0313		92	0.0342		92	0.035
		98	0.0308		98	0.03358		98	0.03524
		110	0.0301		110	0.03123		110	0.03179
		122	0.0294		122	0.03025		122	0.03179
		150	0.0227		150	0.02938		150	0.02988
	Initial dry density (g/cm3)	Time ( h )	Mass water content	Initial dry density (g/cm3)	Time ( h )	Mass water content	Initial dry density (g/cm3)	Time ( h )	Mass water content
	1.45	0	0.34908		0	0.345		0	0.31802
		8	0.32184		8	0.31111		8	0.251
		14	0.27805		14	0.24689		14	0.19938
		20	0.20011		20	0.19233		20	0.17854
		26	0.18069		26	0.16767		26	0.14698
		32	0.15218		32	0.13944		32	0.11896
		44	0.10818		44	0.10166		44	0.08503
		50	0.09643		50	0.09044		50	0.07305
		56	0.06936	1.5	56	0.06786	1.6	56	0.05146
		68	0.04483		68	0.04967		68	0.04344
		74	0.03816		74	0.04256		74	0.03448
		92	0.03448		92	0.03389		92	0.03229
		98	0.03195		98	0.03267		98	0.03146
		110	0.03115		110	0.03067		110	0.03135
		122	0.03103		122	0.02989		122	0.02979
		150	0.03023		150	0.02989		150	0.02958
	S3: This table is corresponding to Figure4 (a) (Fitting diagram of SWCCs with initial different dry densities)				S4: This table is corresponding to Figure 4 (b) ( Fitting diagram of SWCCs with initial different dry densities)				S5: This table is corresponding to Figure 4 (c) ( Fitting diagram of SWCCs with initial different dry densities)
	Initial dry density (g/cm3)	Matrix suction (kPa)	Volumetric water content		Initial dry density (g/cm3)	Matrix suction (kPa)	Volumetric water content		Initial dry density (g/cm3)	Matrix suction (kPa)	Volumetric water content
	1.3	0.1	0.53651		1.35	0.1	0.521505		1.4	0.1	0.51464
		5	0.49413			5	0.497205			5	0.5054
		10	0.44616			10	0.46818			10	0.4802
		30	0.36595			30	0.382995			30	0.38752
		80	0.33761			80	0.3537			80	0.35784
		160	0.31928			160	0.3348			160	0.34006
		280	0.30407			280	0.319005			280	0.32466
		450	0.29276			450	0.30672			450	0.3129
		700	0.28132			700	0.29484			700	0.30086
		1250	0.2678			1250	0.279585			1250	0.28602
	S6: This table is corresponding to Figure 4 (d) (Fitting diagram of SWCCs with initial different dry densities)				S7: This table is corresponding to Figure 4 (e) (Fitting diagram of SWCCs with initial different dry densities)				S8: This table is corresponding to Figure 4 (f) (Fitting diagram of SWCCs with initial different dry densities)
	Initial dry density (g/cm3)	Matrix suction (kPa)	Volumetric water content		Initial dry density (g/cm3)	Matrix suction (kPa)	Volumetric water content		Initial dry density (g/cm3)	Matrix suction (kPa)	Volumetric water content
	1.45	0.1	0.503295		1.5	0.1	0.50625		1.4	0.1	0.49216
		5	0.49155			5	0.50085			5	0.49216
		10	0.48952			10	0.4983			10	0.48992
		30	0.396865			30	0.41685			30	0.45552
		80	0.366995			80	0.38475			80	0.408
		160	0.34974			160	0.3666			160	0.38864
		280	0.334515			280	0.34995			280	0.37152
		450	0.322045			450	0.33735			450	0.35776
		700	0.309865			700	0.32505			700	0.34528
		1250	0.293625			1250	0.3087			1250	0.32688
	S9: This table is corresponding to Figure5 (a) ( Fitting comparison diagram of limited and unlimited residual water content model )				S10: This table is corresponding to Figure 5 (b) ( Fitting comparison diagram of limited and unlimited residual water content model )				S11: This table is corresponding to Figure 5 (c) ( Fitting comparison diagram of limited and unlimited residual water content model )
	Initial dry density (g/cm3)	Matrix suction (kPa)	Volumetric water content		Initial dry density (g/cm3)	Matrix suction (kPa)	Volumetric water content		Initial dry density (g/cm3)	Matrix suction (kPa)	Volumetric water content
	1.3	0.1	0.53651		1.35	0.1	0.521505		1.4	0.1	0.51464
		5	0.49413			5	0.497205			5	0.5054
		10	0.44616			10	0.46818			10	0.4802
		30	0.36595			30	0.382995			30	0.38752
		80	0.33761			80	0.3537			80	0.35784
		160	0.31928			160	0.3348			160	0.34006
		280	0.30407			280	0.319005			280	0.32466
		450	0.29276			450	0.30672			450	0.3129
		700	0.28132			700	0.29484			700	0.30086
		1250	0.2678			1250	0.279585			1250	0.28602
	S12: This table is corresponding to Figure 5(d) ( Fitting comparison diagram of limited and unlimited residual water content model )				S13: This table is corresponding to Figure 5 (e) ( Fitting comparison diagram of limited and unlimited residual water content model )				S14: This table is corresponding to Figure 5 (f) ( Fitting comparison diagram of limited and unlimited residual water content model )
	Initial dry density (g/cm3)	Matrix suction (kPa)	Volumetric water content		Initial dry density (g/cm3)	Matrix suction (kPa)	Volumetric water content		Initial dry density (g/cm3)	Matrix suction (kPa)	Volumetric water content
	1.45	0.1	0.503295		1.5	0.1	0.50625		1.4	0.1	0.49216
		5	0.49155			5	0.50085			5	0.49216
		10	0.48952			10	0.4983			10	0.48992
		30	0.396865			30	0.41685			30	0.45552
		80	0.366995			80	0.38475			80	0.408
		160	0.34974			160	0.3666			160	0.38864
		280	0.334515			280	0.34995			280	0.37152
		450	0.322045			450	0.33735			450	0.35776
		700	0.309865			700	0.32505			700	0.34528
		1250	0.293625			1250	0.3087			1250	0.32688
